# Supplementary material for: Subcellular localization of hippocampal ryanodine receptor 2 and its role in neuronal excitability and memory
Source: PubMed Central journal article supplement (PMC8888588; doi:10.1038/s42003-022-03124-2), 2022-03-01
Supplement: 42003_2022_3124_MOESM1_ESM.pdf [file 42003_2022_3124_MOESM1_ESM.pdf]

**Supplementary Information for**

**Subcellular Localization of Hippocampal Ryanodine Receptor 2 and its Role in  
Neuronal Excitability and Memory**

Florian Hiess<sup>1,#,a</sup>, Jinjing Yao<sup>1,\$,a</sup>, Zhenpeng Song<sup>1,%</sup>, Bo Sun<sup>1,\$</sup>, Zizhen Zhang<sup>2</sup>, Junting Huang<sup>2</sup>, Lina Chen<sup>2</sup>, Adam Institoris<sup>2</sup>, John Paul Estillore<sup>1</sup>, Ruiwu Wang<sup>1</sup>, Henk E.D.J. ter Keurs<sup>3</sup>, Peter K. Stys<sup>2,4</sup>, Grant R. Gordon<sup>2</sup>, Gerald W. Zamponi<sup>2</sup>, Anutosh Ganguly<sup>5</sup>, and S. R. Wayne Chen<sup>1,2,\*</sup>

S. R. Wayne Chen  
Email: swchen@ucalgary.ca

**This PDF file includes:**

Figures S1 to S15

**Fig. S1.**

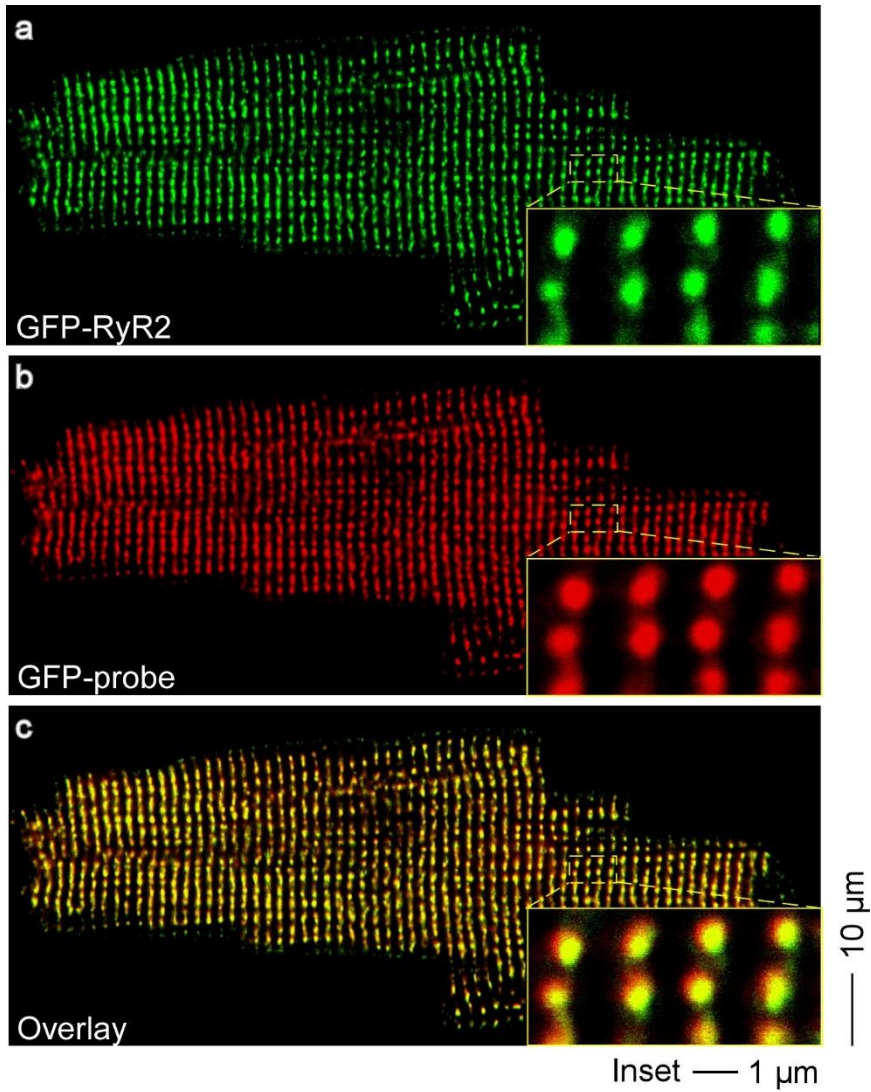

**Supplemental Fig. 1 Co-localization of GFP fluorescence and GFP-probe staining in ventricular myocytes isolated from the GFP-RyR2 mice**

Representative confocal images of ventricular myocytes isolated from GFP-RyR2 expressing mice. Localization of GFP-RyR2 by virtue of the GFP fluorescence (a) and signals of AF647 conjugated GFP-probe (b) showing typical single-rowed arrays of RyR2 clusters in the interior of ventricular myocytes. (c) Signal overlap between GFP-RyR2 and GFP-probe fluorescence.

**Fig. S2.**

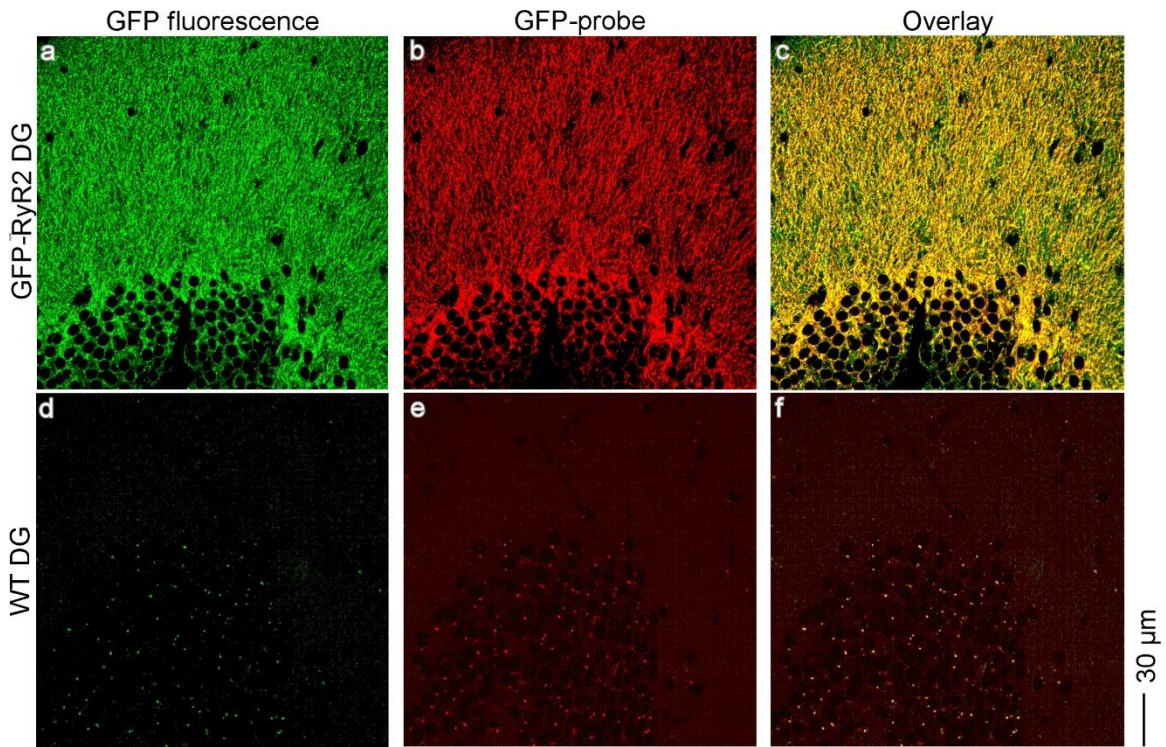

**Supplemental Fig. 2 Subcellular localization of GFP-RyR2 in hippocampal dentate gyrus granular neurons in fixed brain slice**

Representative confocal images of the dentate gyrus (DG) in GFP-probe labelled fixed brain slices (150 μm thick). GFP-RyR2 fluorescence (a) and GFP-probe signals (b) overlap in the dendrites and soma of granular-shaped cells in DG (c). There is little GFP-RyR2 fluorescence (d), GFP-probe signals (e), or overlay between these signals (f) in DG from WT fixed brain slices (n = 25 images from 8 brains).



**Fig. S3.**

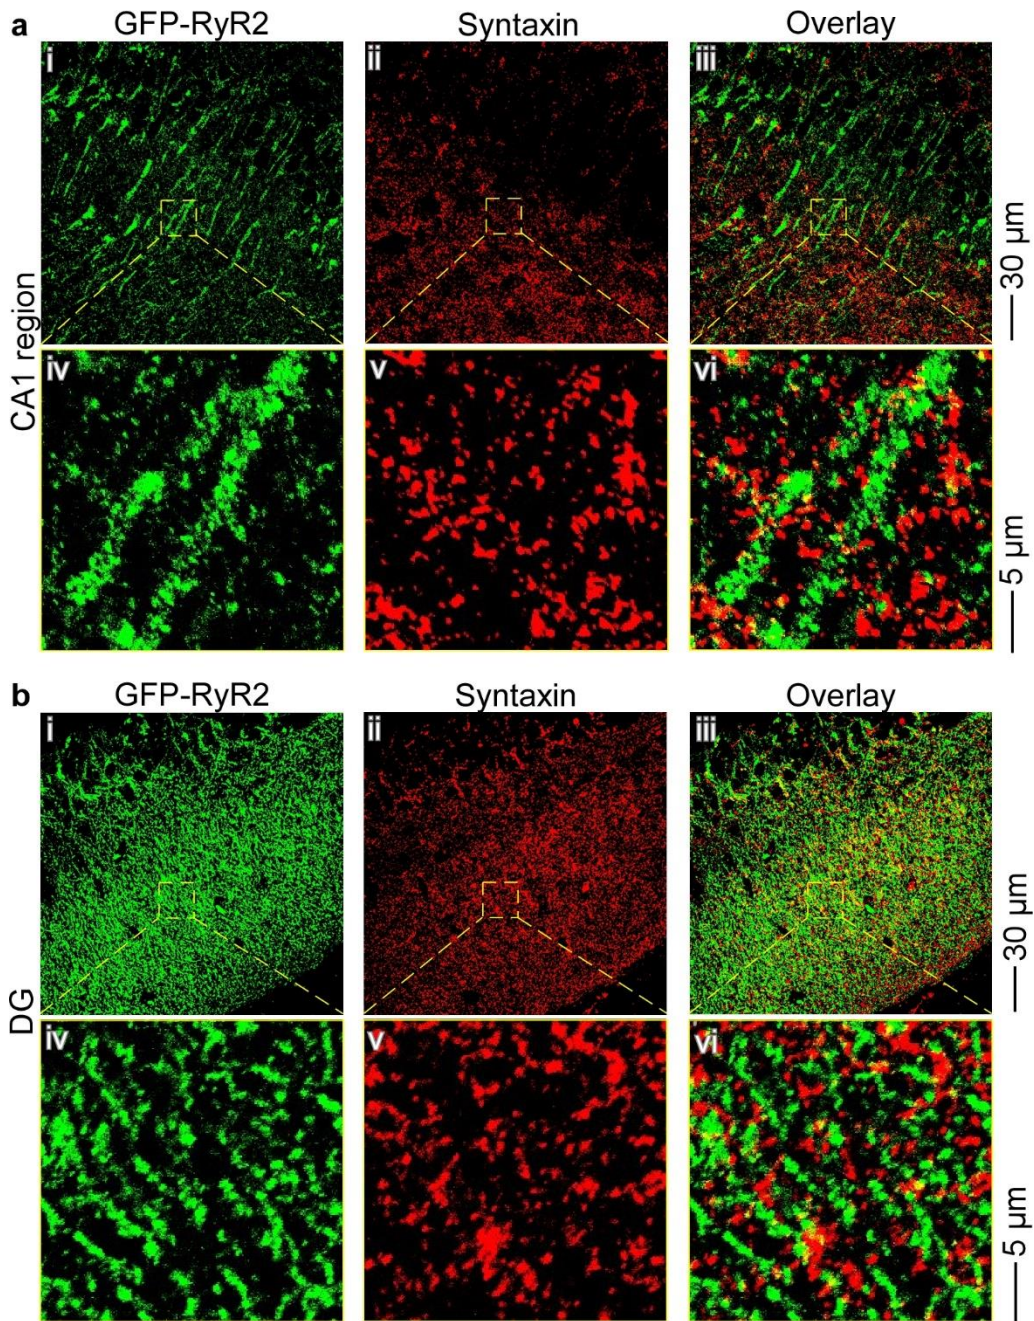

**Supplemental Fig. 3 Co-localization of GFP-RyR2 with presynaptic vesicle fusion protein syntaxin in CA1 and dentate gyrus regions in fixed brain slices using confocal imaging**

Representative confocal fluorescence images of hippocampal CA1 (a) and dentate gyrus (b) regions in fixed brain slices from mice expressing a GFP-tagged RyR2 that were co-

stained with the GFP-probe (displayed in green) and the presynaptic vesicle fusion protein syntaxin (n = 8 from 3 brains). GFP-probe staining (i, iv), syntaxin staining (ii, v) and overlay of the GFP-probe and syntaxin signals (iii, vi) are depicted.



**Fig. S4.**

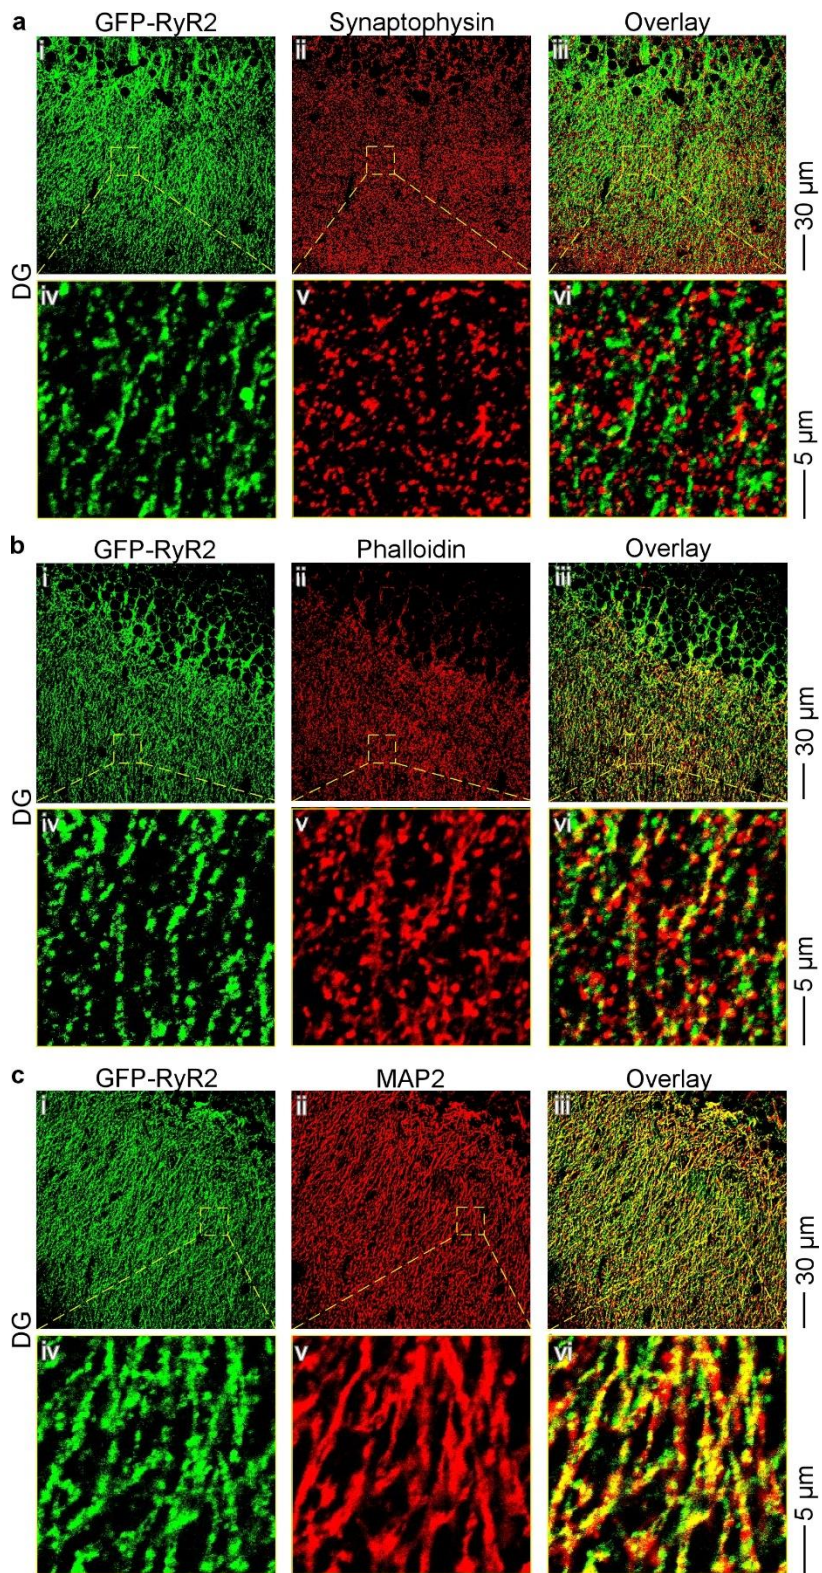

**Supplemental Fig. 4 Co-localization of GFP-RyR2 with synaptic markers in hippocampal dentate gyrus region in fixed brain slices using confocal imaging**

Representative confocal fluorescence images of hippocampal dentate gyrus region in fixed brain slices from mice expressing a GFP-tagged RyR2 that were co-stained with the GFP-probe (displayed in green) and the presynaptic major vesicle protein synaptophysin (**a**), the F-actin targeting phalloidin (**b**), or the microtubule-associated protein 2 (MAP2) (**c**) (n = 35 imaged from 8 brains). GFP-probe staining (i, iv), synaptic marker staining (ii, v), and overlay between the GFP-probe and synaptic marker signals (iii, vi) are depicted.



**Fig. S5.**

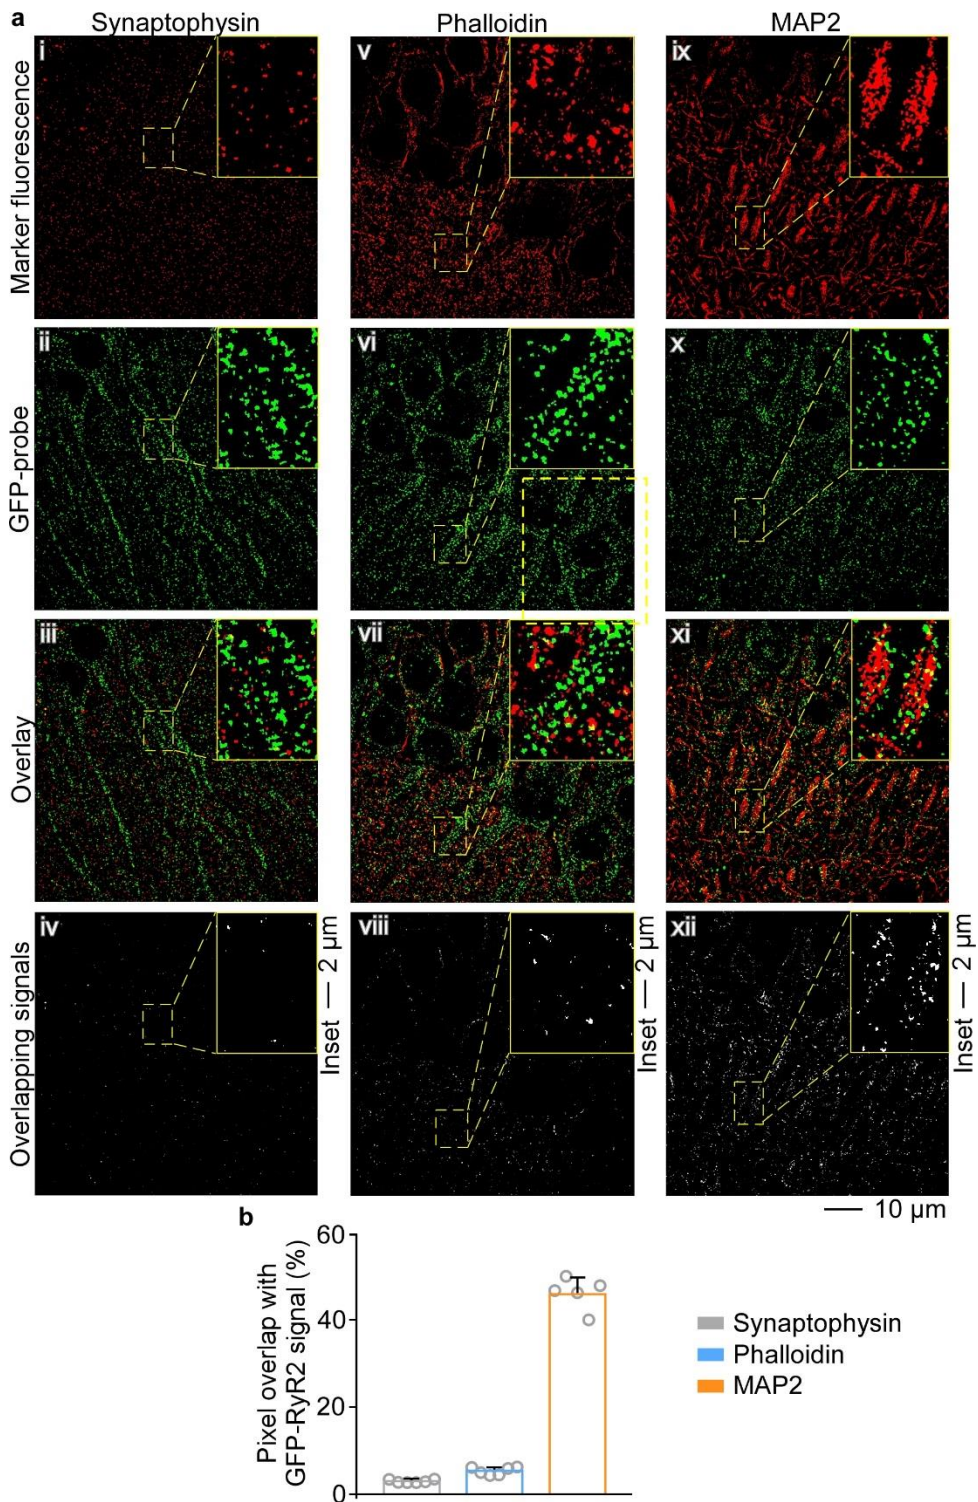

**Supplemental Figure 5 Co-localization of GFP-RyR2 with synaptic markers in hippocampal CA1 region in fixed brain slices using SIM imaging**



Co-localization of GFP-RyR2 and synaptic markers was determined using structured-illumination microscopic (SIM) imaging of the hippocampal CA1 region. Fixed brain slices were prepared from GFP-RyR2 mice and co-stained with the presynaptic major vesicle protein synaptophysin (**ai-iv**), the F-actin targeting phalloidin (**av-viii**), or the microtubule-associated protein 2 (MAP2) (**aix-xii**). The synaptic marker fluorescence (**ai, v, ix**), GFP-probe staining (**aii, vi, x**), overlay between the GFP-probe and synaptic marker signals (**aiii, vii, xi**), and the extent of overlapping signals between the GFP-probe and synaptic markers (**aiv, viii, xii**) are shown. Overlapping signals between GFP-RyR2 and synaptophysin, phalloidin or MAP2 were quantified in panel **b**. Data shown are mean  $\pm$  SEM (n = 6 images from 3 brains).

**Fig. S6.**

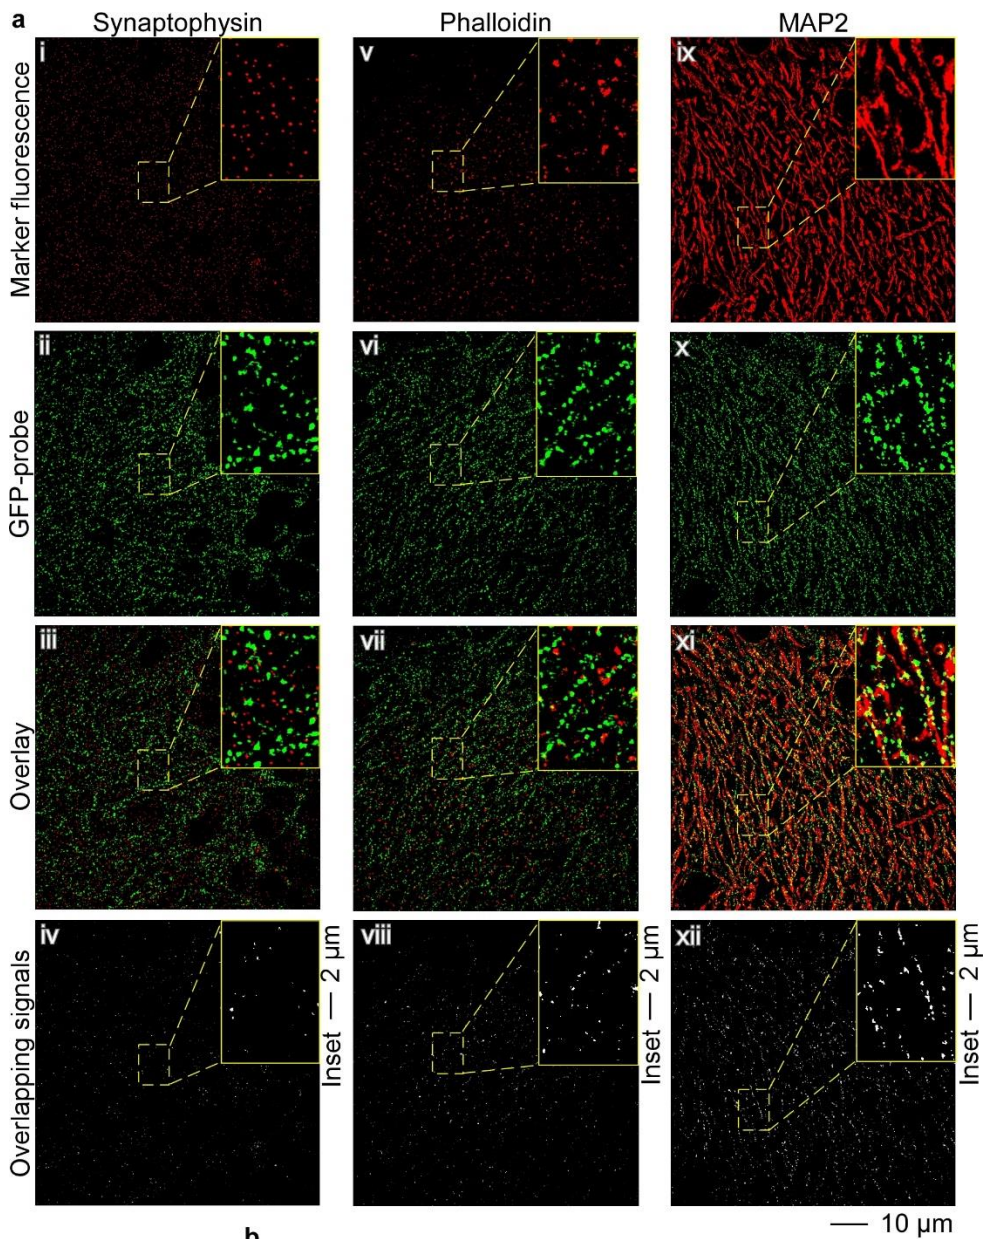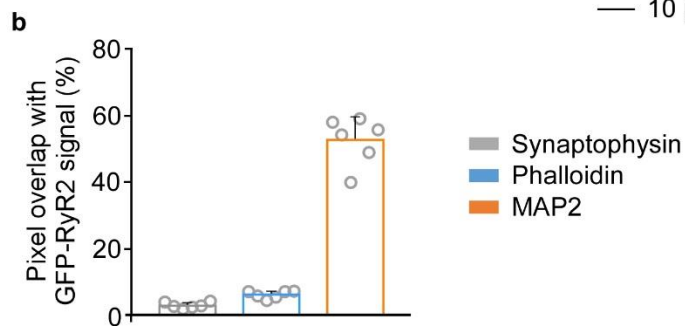

**Supplemental Fig. 6 Co-localization of GFP-RyR2 with synaptic markers in hippocampal dentate gyrus region in fixed brain slices using SIM imaging**

Co-localization of GFP-RyR2 and synaptic markers was determined using structured-illumination microscopic (SIM) imaging of the hippocampal dentate gyrus region. Fixed brain slices were prepared from GFP-RyR2 mice and co-stained with presynaptic major vesicle protein synaptophysin (**ai-iv**), the F-actin targeting phalloidin (**av-viii**), or the microtubule-associated protein 2 (MAP2) (**aix-xii**). The synaptic marker fluorescence (**ai, v, ix**), GFP-probe staining (**aii, vi, x**), overlay between the GFP-probe and synaptic marker signals (**aiii, vii, xi**), and the extent of overlapping signals between the GFP-probe and synaptic markers (**aiv, viii, xii**) are shown. Overlapping signals between GFP-RyR2 and synaptophysin, phalloidin, or MAP2 were quantified in panel **b**. Data shown are mean  $\pm$  SEM (n = 6 images from 3 brains).



**Fig. S7.**

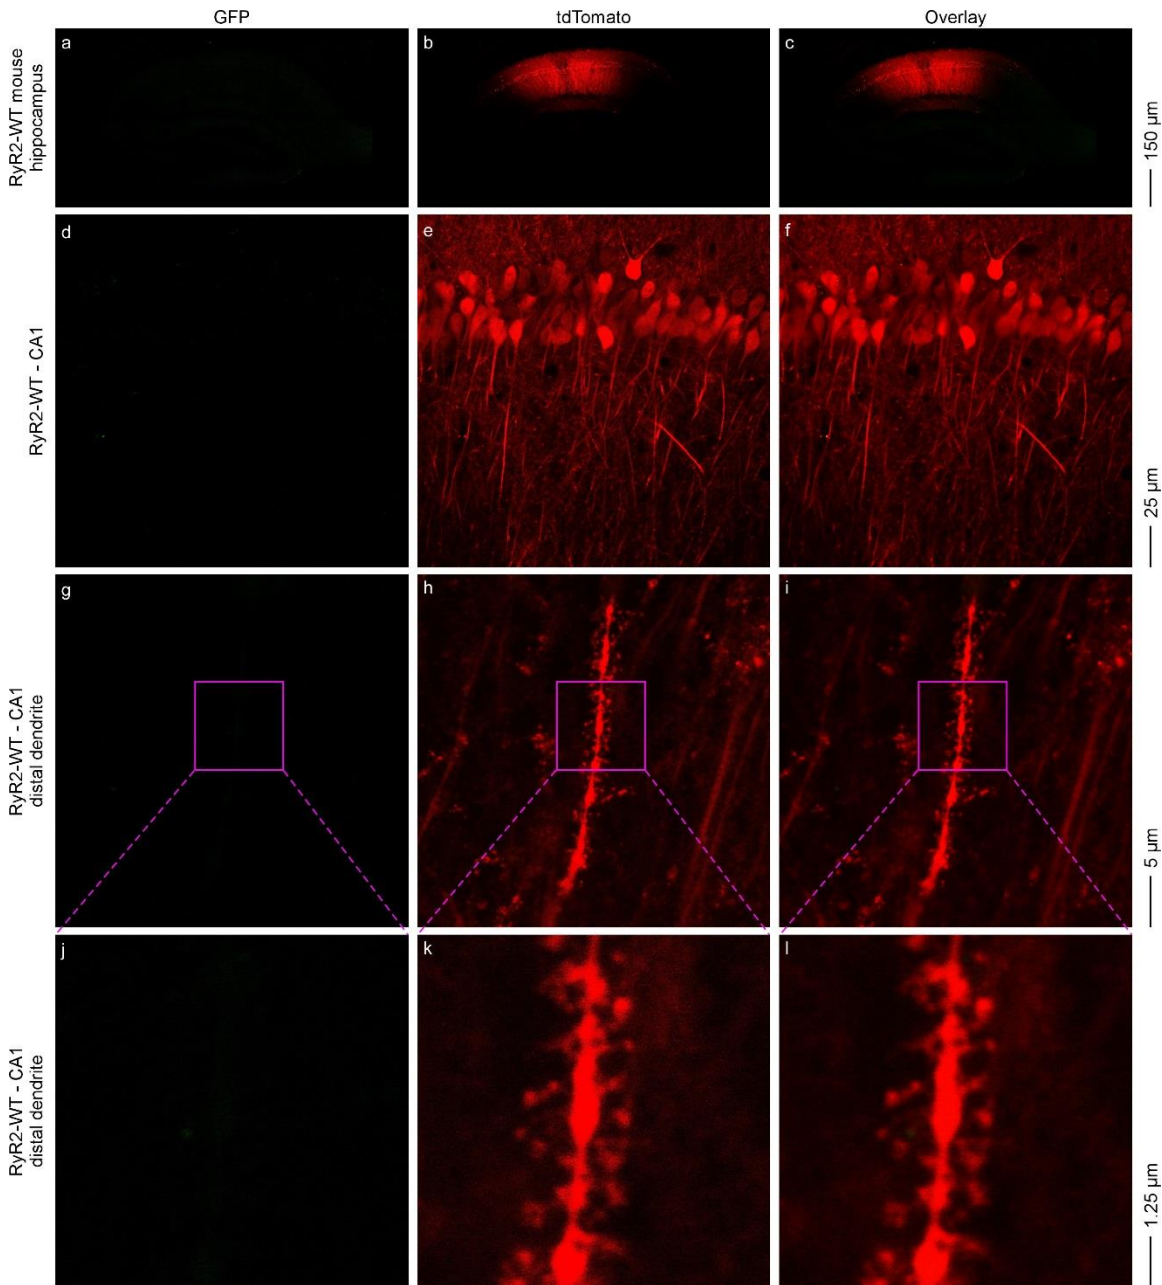

**Supplemental Fig. 7 Confocal imaging of live hippocampal slices from non-GFP RyR2 WT mice with AAV9-tdTomato infected CA1 region**

Representative confocal fluorescence images of live hippocampal slices from mice expressing the non-GFP RyR2 WT with AAV9-tdTomato infected CA1 region. Note that no GFP signals were detected (n = 9 images from 3 brains). Images of the whole hippocampal area showing the AAV9-tdTomato infected CA1 region (a-c). Magnified

views showing the CA1 area (d-f), a single tdTomato-filled distal dendrite (g-i), and the dendritic spines of the tdTomato-filled distal dendrite (j-l).

**Fig. S8.**

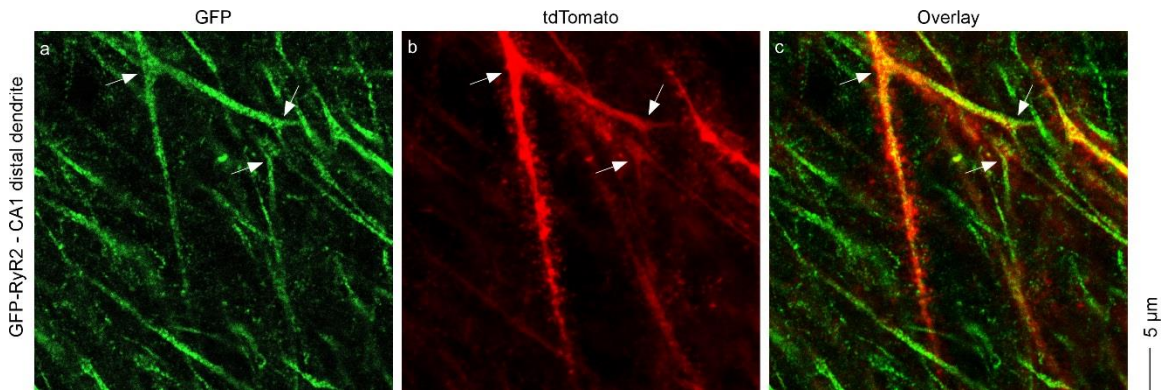

**Supplemental Fig. 8 Confocal imaging of live hippocampal slices from GFP-RyR2 mice with AAV9-tdTomato infected CA1 region showing dendritic shafts and branch points**

Representative confocal fluorescence images of live hippocampal slices from mice expressing the GFP-tagged RyR2 with AAV9-tdTomato infected CA1 neuron distal dendrites. (a) GFP-RyR2 signal from distal dendritic area of CA1 neurons. (b) tdTomato signal from the same area. (c) Signal overlap between GFP-RyR2 and tdTomato fluorescence. Arrows indicate the branch points (n = 7 images from 3 brains).



**Fig. S9**

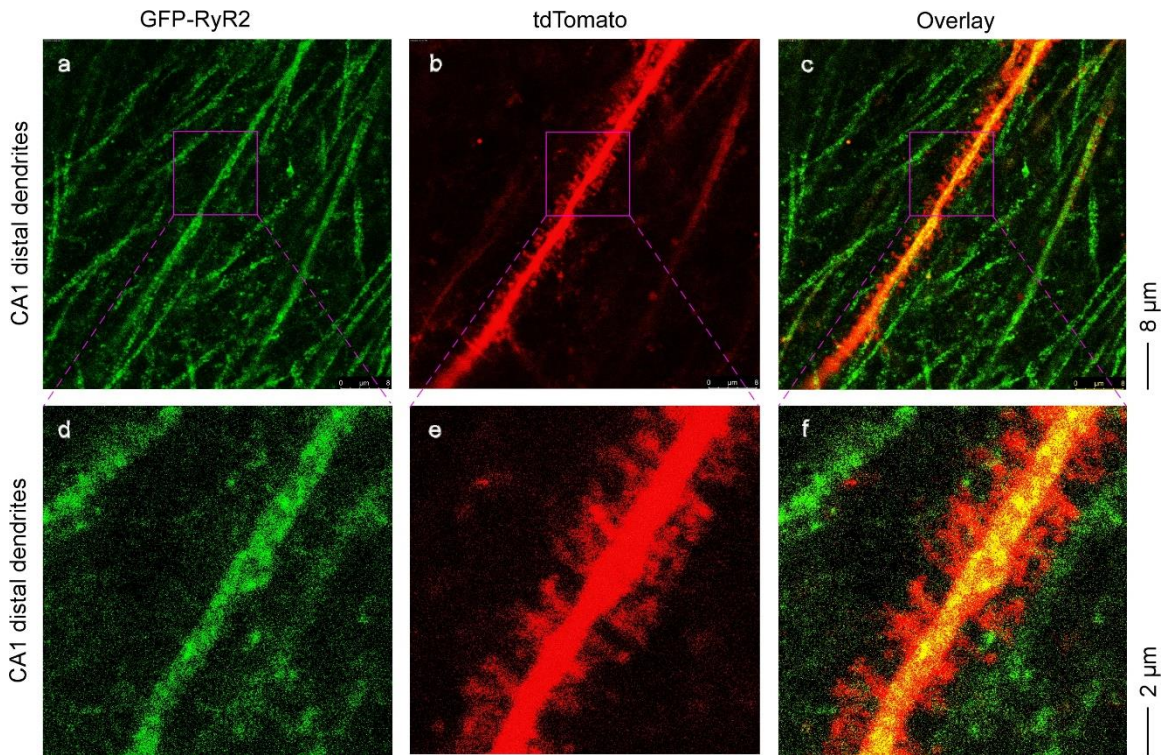

**Supplemental Fig. 9 Two-photon dual imaging of live hippocampal slices from GFP-RyR2 mice with AAV9-tdTomato infected CA1 region**

Representative confocal fluorescence images of live hippocampal slices from mice expressing the GFP-tagged RyR2 with AAV9-tdTomato infected CA1 region (n = 25 images from 4 brains). Magnified views showing a single tdTomato-filled distal dendrite (a-c) and the dendritic spines of the tdTomato-filled distal dendrite (d-f).

**Fig. S10.**

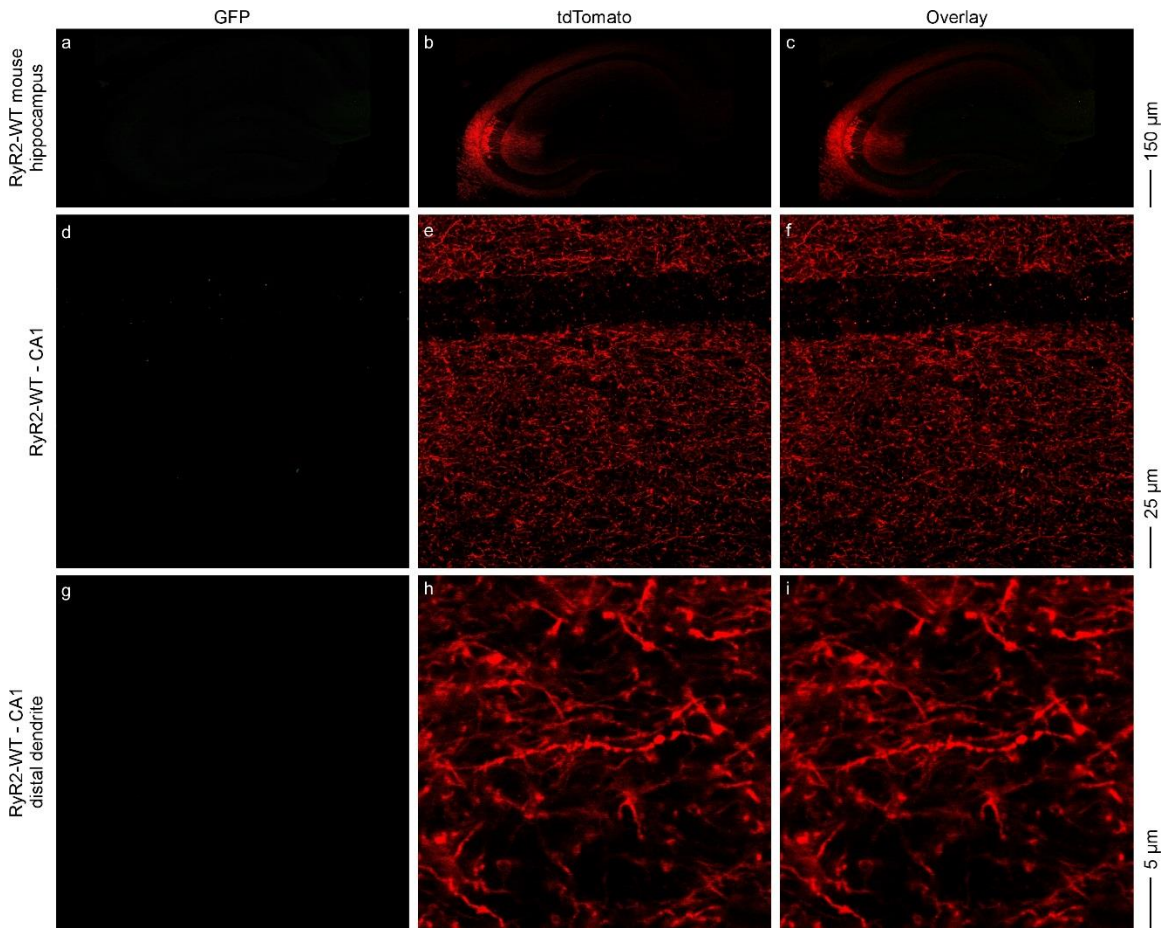

**Supplemental Fig. 10 Confocal imaging of live hippocampal slices from non-GFP-RyR2 WT mice with AAV9-tdTomato infected CA3 region**

Representative confocal fluorescence images of live hippocampal slices from mice expressing the non-GFP RyR2 WT with AAV9-tdTomato infected CA3 region (n = 9 images from 3 brains). Images of the whole hippocampal area showing the AAV9-tdTomato infected CA3 region (a-c). Magnified views showing the CA1 area (d-f) and the tdTomato-filled axons from CA3 region (g-i).



**Fig. S11.**

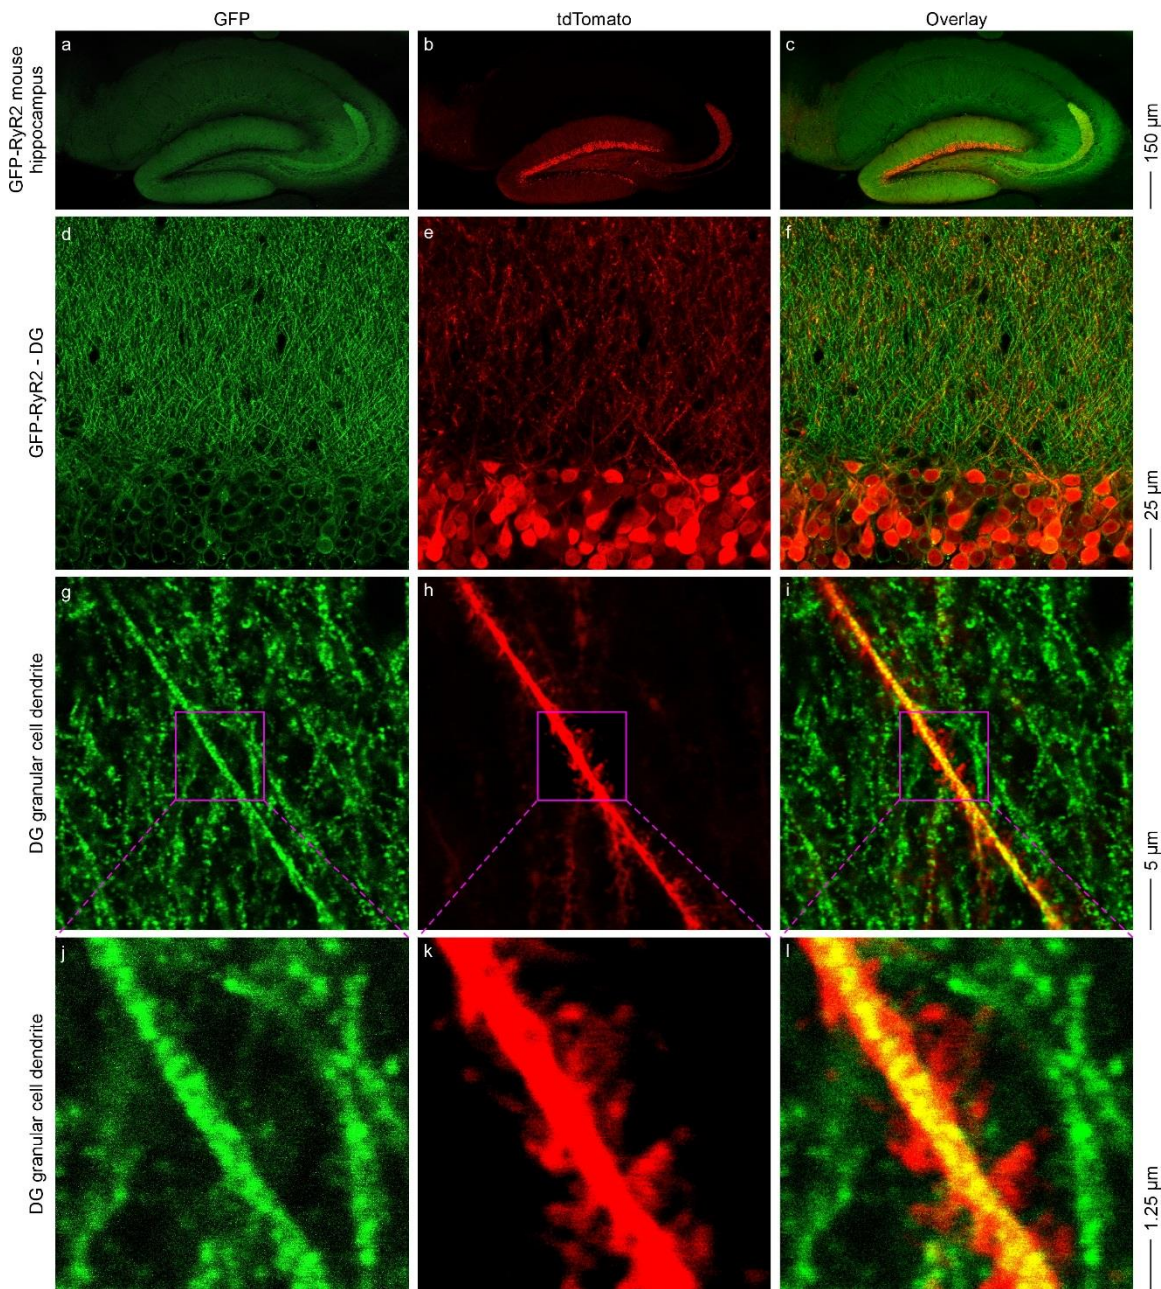

**Supplemental Fig. 11 Confocal imaging of live hippocampal slices from GFP-RyR2 mice with AAV9-tdTomato infected dentate gyrus (DG) region**

Representative confocal fluorescence images of live hippocampal slices from mice expressing the GFP-tagged RyR2 with AAV9-tdTomato infected DG region (n = 12 images from 4 brains). Images of the whole hippocampal area showing the AAV9-tdTomato infected DG region (a-c). Magnified views showing the DG area (d-f), a single



tdTomato-filled granular neuron dendrite (g-i), and the dendritic spines of the tdTomato-filled granular neuron dendrite (j-l).

**Fig. S12.**

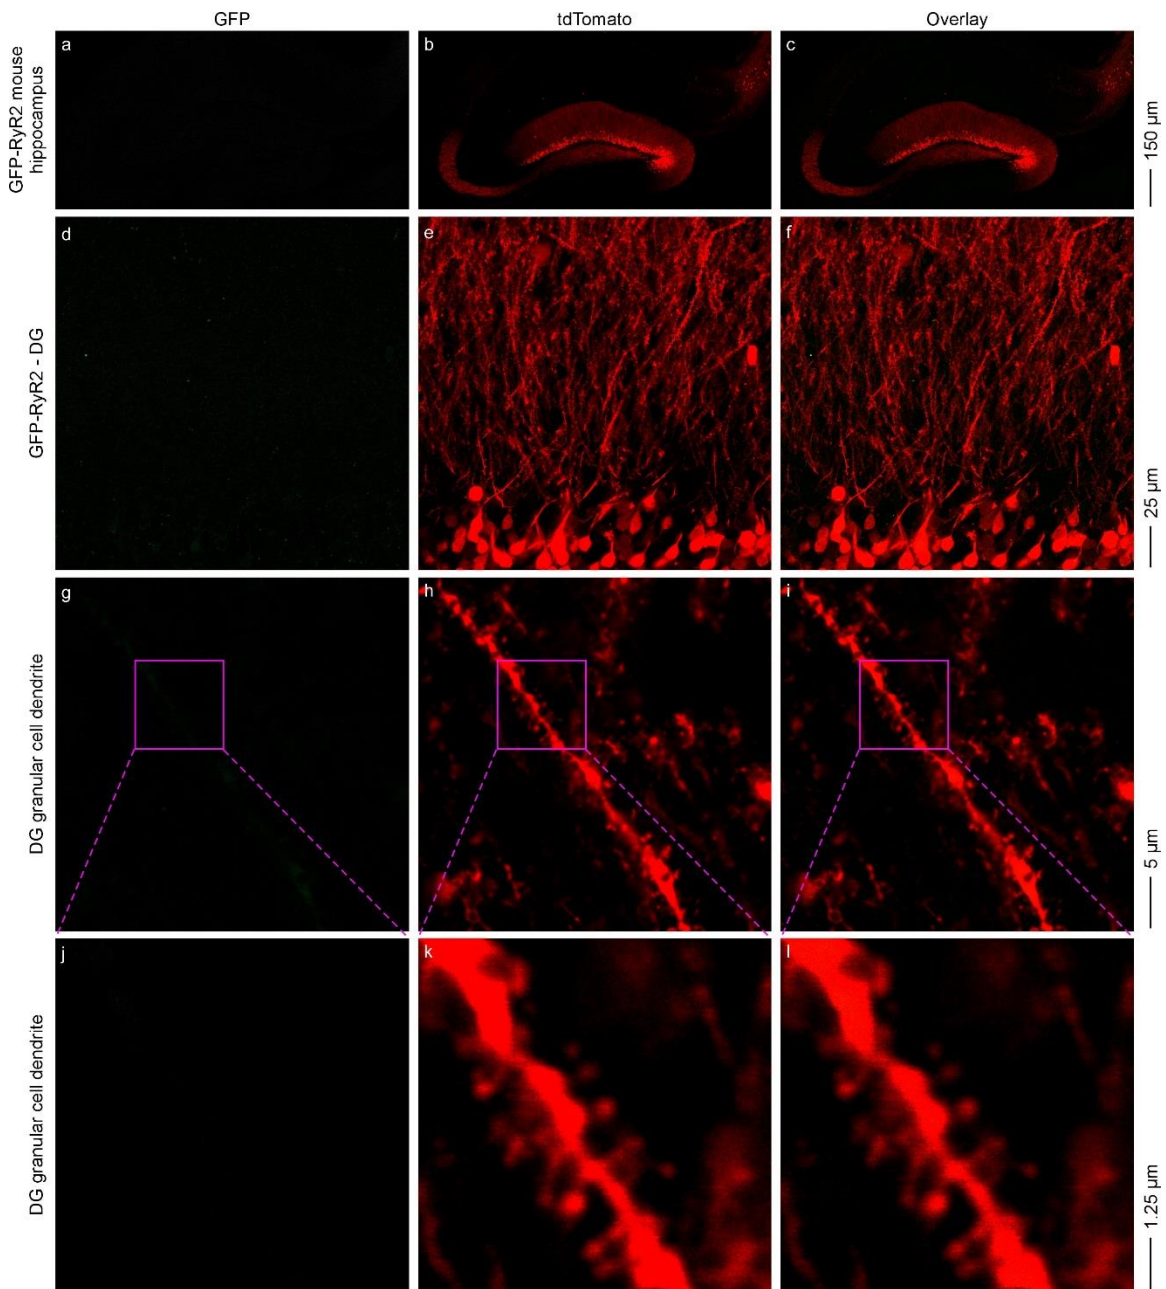

**Supplemental Fig. 12 Confocal imaging of live hippocampal slices from non-GFP RyR2 WT mice with AAV9-tdTomato infected dentate gyrus (DG) region**

Representative confocal fluorescence images of live hippocampal slices from mice expressing the non-GFP RyR2 WT with AAV9-tdTomato infected DG region (n = 9 images from 3 brains). Images of the whole hippocampal area showing the AAV9-tdTomato infected DG region (a-c). Magnified views showing the DG area (d-f), a single

tdTomato-filled granular neuron dendrite (g-i), and the dendritic spines of the tdTomato-filled granular neuron dendrite (j-l).

**Fig. S13.**

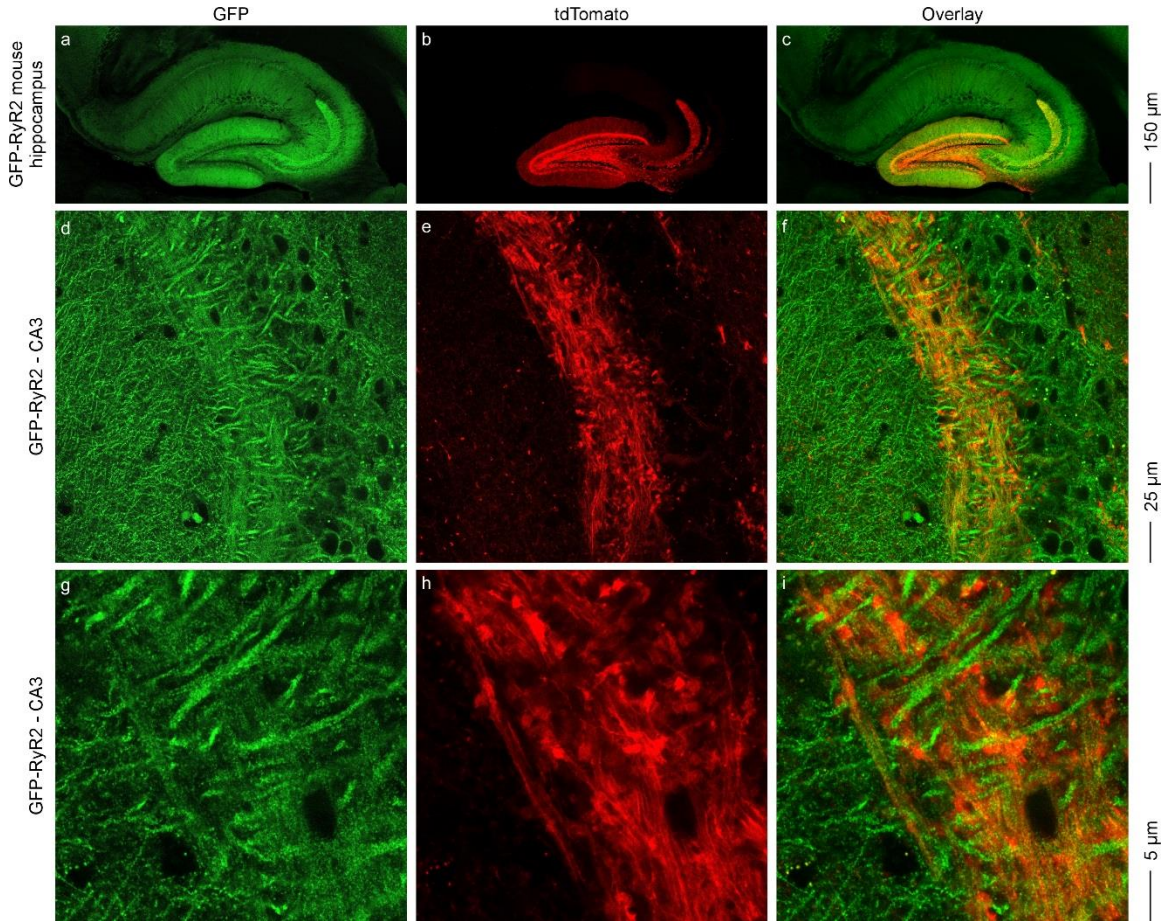

**Supplemental Fig. 13 Confocal imaging of live hippocampal slices from GFP-RyR2 mice with AAV9-tdTomato infected DG granular neurons**

Representative confocal fluorescence images of live hippocampal slices from mice expressing the GFP-tagged RyR2 with AAV9-tdTomato infected DG granular neurons (n = 8 images from 3 brains). Images of the whole hippocampal area showing the AAV9-tdTomato infected DG granular neurons (a-c). Magnified views showing the CA3 stratum lucidum area (d-f) and tdTomato-filled axons from the DG granular neurons and distal dendrites of CA3 neurons (g-i).



**Fig. S14.**

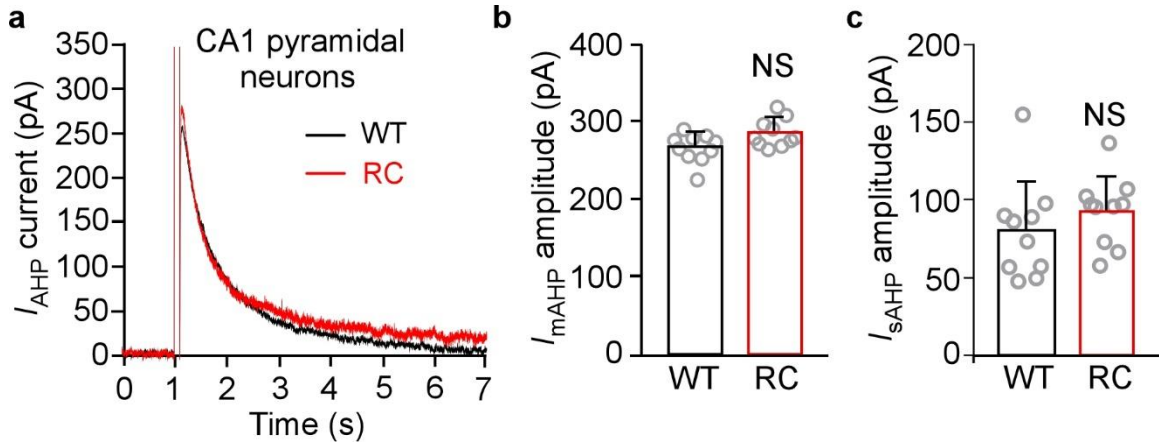

**Supplemental Fig. 14 CPVT RyR2 mutation R4496C<sup>+/-</sup> does not affect afterhyperpolarization current ( $I_{AHP}$ ) in CA1 pyramidal neurons**

(a) Representative traces of  $I_{AHP}$  from 3-4 months old RyR2 WT and R4496C<sup>+/-</sup> (RC) CA1 neurons. (b)  $I_{mAHP}$  amplitude in 3-4 months old RyR2 WT (10 mice, 20 neurons) and R4496C<sup>+/-</sup> (RC) (10 mice, 20 neurons) CA1 neurons. (c)  $I_{sAHP}$  amplitude in 3-4 months old RyR2 WT (10 mice, 20 neurons) and R4496C<sup>+/-</sup> (RC) (10 mice, 20 neurons) CA1 neurons. (Mann-Whitney  $U$  test, NS, not significant).

**Fig. S15.**

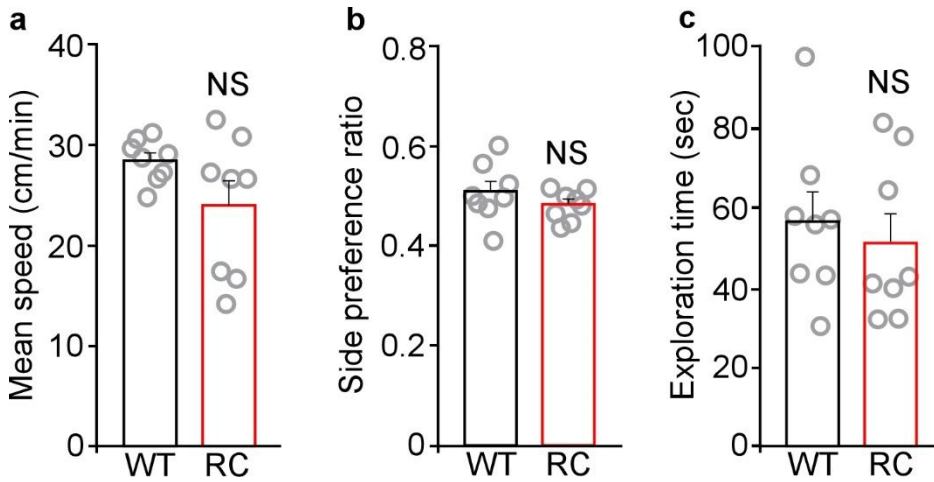

**Supplemental Fig. 15 Effect of the CPVT RyR2 R4496C<sup>+/-</sup> mutation on swimming speed, side preference, and exploration time**

The mean swimming speed (a) in Morris water maze test, and the side preference (b) and exploration time (c) in novel objective preference test of WT and RyR2-R4496C<sup>+/-</sup> mutant mice are shown. Note that there are no significant differences in these parameters between the WT and R4996C<sup>+/-</sup> mutant mice. Data shown are mean ± SEM (n = 8 for WT, and 8 for R4496C<sup>+/-</sup>) (Mann-Whitney *U* test, NS, not significant).
