# Supplementary material for: Subcellular localization of hippocampal ryanodine receptor 2 and its role in neuronal excitability and memory
Source: PubMed Central journal article supplement (PMC8888588; doi:10.1038/s42003-022-03124-2), 2022-03-01
Supplement: 42003_2022_3124_MOESM2_ESM.pdf [file 42003_2022_3124_MOESM2_ESM.pdf]

## Description of Additional Supplementary Files

**File name:** Supplementary Data 1

**Description:** Source data for main figures.
